# Supplementary material for: Ultrafast, green and recyclable photoRDRP in an ionic liquid towards multi-stimuli responsive amphiphilic copolymers
Source: Royal Society of Chemistry journal article supplement (doi:10.1039/d1py01014j), 2021-01-01
Supplement: d1py01014j1.pdf [file d1py01014j1.pdf]

**Electronic Supplementary Information**

**Ultrafast, Green and Recyclable PhotoRDRP in Ionic Liquid  
Towards Multi-stimuli Responsive Amphiphilic Copolymers**

Sk Arif Mohammad, Devendra Kumar, Md. Mehboob Alam and Sanjib Banerjee\*

Department of Chemistry, Indian Institute of Technology Bhilai, Raipur 492015, Chhattisgarh, India

\*Corresponding Author: E-mail: [sanjib.banerjee@iitbhilai.ac.in](mailto:sanjib.banerjee@iitbhilai.ac.in) (S. Banerjee)

**Table of contents :**

|                                                                                    |               |
|------------------------------------------------------------------------------------|---------------|
| <b>A. Computational details.....</b>                                               | <b>S3-S7</b>  |
| <b>B. Supporting tables and fugures.....</b>                                       | <b>S8-S12</b> |
| Table S1. Alloy-mediated photoRDRP of GMA under different reaction conditions..... | S8            |
| Table S2. Synthesis of PGMA with varying molar masses.....                         | S8            |
| Table S3. Catalyst recyclability study.....                                        | S9            |
| Table S4. IL recyclability study.....                                              | S9            |
| Fig. S1 Representative image of the ionic liquid, BMIMBr.....                      | S10           |
| Fig. S2 Evolution of $M_n$ and $D$ with increasing $[GMA]_0/[EBiB]_0$ .....        | S10           |
| Fig. S3 Evidence of temporal control : Plot of conversion vs. Time.....            | S11           |
| Fig. S4 Evolution of SEC traces during <i>in situ</i> chain extension.....         | S11           |
| Fig. S5 ATR-IR spectra of SEC traces of PGMA-Br and PGMA- <i>b</i> -PPEGMA.....    | S12           |
| <b>D. References.....</b>                                                          | <b>S13</b>    |

## Computational details

[Me<sub>6</sub>TREN]<sup>+</sup>, Charge = +1, Multiplicity = 2, optimized coordinates

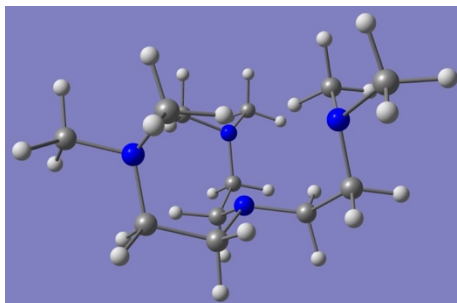

|   |              |              |              |
|---|--------------|--------------|--------------|
| N | -0.002691000 | -0.000202000 | -1.180965000 |
| C | 0.621063000  | -1.266669000 | -1.589468000 |
| C | -0.009242000 | -2.511091000 | -0.969927000 |
| H | 1.679718000  | -1.226978000 | -1.304558000 |
| H | 0.603271000  | -1.393076000 | -2.694265000 |
| H | 0.592671000  | -3.387074000 | -1.297813000 |
| H | -1.021546000 | -2.684003000 | -1.364234000 |
| C | -1.411648000 | 0.094116000  | -1.588223000 |
| C | -2.171692000 | 1.266534000  | -0.973958000 |
| H | -1.908126000 | -0.840399000 | -1.298310000 |
| H | -1.513296000 | 0.167267000  | -2.693239000 |
| H | -3.232317000 | 1.181799000  | -1.298279000 |
| H | -1.816055000 | 2.226761000  | -1.376037000 |
| C | 0.783307000  | 1.175129000  | -1.582062000 |
| C | 2.177395000  | 1.245158000  | -0.964617000 |
| H | 0.220759000  | 2.070533000  | -1.289332000 |
| H | 0.899921000  | 1.231305000  | -2.686570000 |
| H | 2.634654000  | 2.207198000  | -1.284580000 |
| H | 2.832261000  | 0.458756000  | -1.368068000 |
| N | 2.191832000  | 1.124864000  | 0.492267000  |
| N | -2.080466000 | 1.338819000  | 0.483211000  |
| N | -0.107088000 | -2.466957000 | 0.487685000  |
| C | 1.310728000  | 2.020532000  | 1.219824000  |
| H | 0.256451000  | 1.810027000  | 0.968153000  |
| H | 1.452387000  | 1.867734000  | 2.296973000  |
| H | 1.520183000  | 3.086240000  | 0.994232000  |
| C | 3.529998000  | 0.993612000  | 1.052685000  |
| H | 4.118651000  | 1.927205000  | 0.944564000  |
| H | 3.464977000  | 0.757342000  | 2.122720000  |
| H | 4.074751000  | 0.188373000  | 0.541337000  |

|   |              |              |             |
|---|--------------|--------------|-------------|
| C | 1.114351000  | -2.151560000 | 1.205727000 |
| H | 0.919784000  | -2.199502000 | 2.284330000 |
| H | 1.931373000  | -2.864975000 | 0.972577000 |
| H | 1.456118000  | -1.132541000 | 0.953045000 |
| C | -0.887022000 | -3.559132000 | 1.053964000 |
| H | -0.375630000 | -4.536440000 | 0.940544000 |
| H | -1.049376000 | -3.384947000 | 2.125556000 |
| H | -1.861288000 | -3.625764000 | 0.551145000 |
| C | -2.422717000 | 0.128279000  | 1.208667000 |
| H | -2.368099000 | 0.327412000  | 2.286128000 |
| H | -3.449602000 | -0.220971000 | 0.975982000 |
| H | -1.712923000 | -0.680255000 | 0.962291000 |
| C | -2.636800000 | 2.563942000  | 1.041810000 |
| H | -3.739189000 | 2.608034000  | 0.929818000 |
| H | -2.402752000 | 2.625570000  | 2.112567000 |
| H | -2.209368000 | 3.438197000  | 0.532059000 |

**Ni<sup>II</sup>Br<sub>2</sub>[Me<sub>6</sub>TREN] Charge = 0, Multiplicity = 3, optimized coordinates**

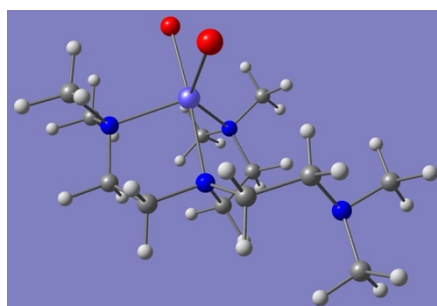

|   |              |             |              |
|---|--------------|-------------|--------------|
| N | 0.567726000  | 1.614721000 | -0.279259000 |
| C | -0.085599000 | 1.591372000 | -1.613565000 |
| C | -1.045826000 | 0.418239000 | -1.743318000 |
| H | 0.694307000  | 1.520974000 | -2.384727000 |
| H | -0.638839000 | 2.528639000 | -1.796978000 |
| H | -1.512426000 | 0.424938000 | -2.747298000 |
| H | -1.855887000 | 0.550525000 | -1.018483000 |
| C | -0.166187000 | 2.445506000 | 0.723254000  |
| C | -1.602242000 | 2.068781000 | 1.084044000  |
| H | -0.116930000 | 3.504426000 | 0.400734000  |
| H | 0.408790000  | 2.347542000 | 1.653787000  |
| H | -1.795523000 | 2.512064000 | 2.087721000  |
| H | -1.652152000 | 0.980033000 | 1.232151000  |
| C | 1.942704000  | 2.170791000 | -0.351369000 |
| C | 2.919140000  | 1.268548000 | -1.087975000 |
| H | 2.279918000  | 2.314301000 | 0.684592000  |

|    |              |              |              |
|----|--------------|--------------|--------------|
| H  | 1.942038000  | 3.170504000  | -0.831369000 |
| H  | 3.920074000  | 1.742389000  | -1.085738000 |
| H  | 2.630373000  | 1.159822000  | -2.143347000 |
| N  | 2.987533000  | -0.090559000 | -0.503535000 |
| N  | -2.649137000 | 2.474759000  | 0.134848000  |
| N  | -0.385615000 | -0.885467000 | -1.486486000 |
| C  | 3.815810000  | -0.099146000 | 0.731109000  |
| H  | 3.397300000  | 0.582573000  | 1.478347000  |
| H  | 3.795981000  | -1.110447000 | 1.153168000  |
| H  | 4.855907000  | 0.190385000  | 0.488546000  |
| C  | 3.616850000  | -1.013334000 | -1.475868000 |
| H  | 4.654106000  | -0.694252000 | -1.689525000 |
| H  | 3.607454000  | -2.026315000 | -1.057475000 |
| H  | 3.047336000  | -1.016557000 | -2.412167000 |
| C  | 0.277434000  | -1.396968000 | -2.701981000 |
| H  | 0.842907000  | -2.300000000 | -2.438543000 |
| H  | -0.468306000 | -1.638277000 | -3.483434000 |
| H  | 0.965372000  | -0.642661000 | -3.105243000 |
| C  | -1.401566000 | -1.876336000 | -1.054845000 |
| H  | -2.190649000 | -1.982074000 | -1.823286000 |
| H  | -0.906707000 | -2.839045000 | -0.882161000 |
| H  | -1.855981000 | -1.550537000 | -0.110403000 |
| C  | -2.826421000 | 3.924408000  | 0.082930000  |
| H  | -3.611881000 | 4.171499000  | -0.645187000 |
| H  | -3.120256000 | 4.352890000  | 1.067705000  |
| H  | -1.902934000 | 4.422920000  | -0.240359000 |
| C  | -3.916754000 | 1.834344000  | 0.484573000  |
| H  | -4.284003000 | 2.132234000  | 1.491658000  |
| H  | -4.685733000 | 2.104911000  | -0.252874000 |
| H  | -3.801654000 | 0.740968000  | 0.479847000  |
| Br | 0.785857000  | -0.231517000 | 2.588687000  |
| Br | 1.515036000  | -3.021585000 | 0.345071000  |
| Ni | 0.995648000  | -0.595753000 | 0.208043000  |

**Co<sup>II</sup>Br<sub>2</sub>[Me<sub>6</sub>TREN] Charge = 0, Multiplicity = 2, optimized coordinates**

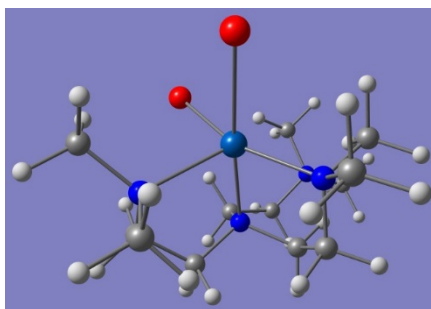

|   |              |              |              |
|---|--------------|--------------|--------------|
| N | -0.768388000 | -0.230555000 | 1.477715000  |
| C | -0.743053000 | 0.274788000  | 0.074054000  |
| C | -1.905644000 | 1.209183000  | -0.187781000 |
| H | -0.825288000 | -0.598320000 | -0.583883000 |
| H | 0.209643000  | 0.789756000  | -0.152031000 |
| H | -1.921373000 | 1.486615000  | -1.260051000 |
| H | -1.814179000 | 2.145732000  | 0.380129000  |
| C | -0.316631000 | 0.864017000  | 2.402830000  |
| C | -0.975034000 | 0.798766000  | 3.771232000  |
| H | -0.548697000 | 1.827664000  | 1.930339000  |
| H | 0.781326000  | 0.830236000  | 2.513952000  |
| H | -0.515370000 | 1.560273000  | 4.436089000  |
| H | -0.811668000 | -0.191627000 | 4.219954000  |
| C | 0.145505000  | -1.435345000 | 1.647754000  |
| C | 0.593653000  | -2.193871000 | 0.393892000  |
| H | -0.352262000 | -2.109882000 | 2.358865000  |
| H | 1.077556000  | -1.086900000 | 2.124079000  |
| H | 1.333822000  | -2.944659000 | 0.758825000  |
| H | 1.158053000  | -1.523783000 | -0.273871000 |
| N | -0.452399000 | -2.835095000 | -0.406608000 |
| N | -2.435669000 | 0.990210000  | 3.661665000  |
| N | -3.190885000 | 0.581892000  | 0.206806000  |
| C | -1.058398000 | -3.980571000 | 0.278785000  |
| H | -1.507177000 | -3.670692000 | 1.232070000  |
| H | -1.855132000 | -4.399063000 | -0.351523000 |
| H | -0.314654000 | -4.784275000 | 0.476307000  |
| C | 0.080508000  | -3.240842000 | -1.706045000 |
| H | 0.898114000  | -3.991028000 | -1.620679000 |
| H | -0.722742000 | -3.684969000 | -2.310161000 |
| H | 0.475747000  | -2.367111000 | -2.246055000 |
| C | -3.548390000 | -0.516737000 | -0.736110000 |
| H | -4.518084000 | -0.925511000 | -0.429182000 |
| H | -3.612817000 | -0.126185000 | -1.769768000 |
| H | -2.796249000 | -1.316491000 | -0.695242000 |
| C | -4.255556000 | 1.613179000  | 0.136861000  |
| H | -4.351254000 | 1.987654000  | -0.898934000 |
| H | -5.199014000 | 1.169656000  | 0.473802000  |
| H | -4.001878000 | 2.448854000  | 0.799044000  |
| C | -2.790535000 | 2.392153000  | 3.387222000  |
| H | -3.877238000 | 2.457840000  | 3.250868000  |
| H | -2.495691000 | 3.054329000  | 4.226306000  |
| H | -2.300374000 | 2.757872000  | 2.476192000  |
| C | -3.097455000 | 0.601658000  | 4.927507000  |

|    |              |              |             |
|----|--------------|--------------|-------------|
| H  | -2.769617000 | 1.261501000  | 5.754626000 |
| H  | -4.183199000 | 0.682558000  | 4.797876000 |
| H  | -2.858392000 | -0.441971000 | 5.157870000 |
| Co | -2.855947000 | -0.469995000 | 1.980876000 |
| Br | -2.530227000 | -2.414756000 | 3.386690000 |
| Br | -5.215388000 | -0.661948000 | 2.347781000 |

## B. Supporting tables and Figures

**Table S1** Reaction conditions and results for the alloy-mediated ambient temperature photoRDRP of GMA in ionic liquid using EBiB as the initiator.<sup>a</sup>

| Entry | Reaction condition                  | Time (min) | Conv. <sup>b</sup> (%) | $M_{n,theo.}^c$ (g mol <sup>-1</sup> ) | $M_{n,SEC}^d$ (g mol <sup>-1</sup> ) | $\bar{D}^d$ |
|-------|-------------------------------------|------------|------------------------|----------------------------------------|--------------------------------------|-------------|
| P1    | GMA/EBiB/Ni-Co/bpy                  | 120        | 0                      | -                                      | -                                    | -           |
| P2    | GMA/EBiB/Ni-Co/PMDETA               | 120        | 32                     | 9300                                   | 8800                                 | 1.46        |
| P3    | GMA/EBiB/Ni-Co/Me <sub>6</sub> TREN | 20         | 100                    | 28600                                  | 27700                                | 1.17        |
| P4    | GMA/Ni-Co/Me <sub>6</sub> TREN      | 120        | 7                      | -                                      | 13100                                | 2.11        |
| P5    | GMA/EBiB/ Me <sub>6</sub> TREN      | 120        | 19                     | 8200                                   | 17300                                | 1.98        |
| P6    | GMA/EBiB/Ni-Co                      | 120        | 0                      | -                                      | -                                    | -           |

<sup>a</sup>Reaction Conditions:  $[GMA]_0/[EBiB]_0 = 200$ . <sup>b</sup>Determined gravimetrically based on monomer feed. <sup>c</sup>Calculated using yield as conversion and the following equation:  $M_{n,theo} = ([GMA]_0/[EBiB]_0 \times yield \times M_{GMA}) + M_{EBiB}$ , where  $M_{GMA}$  (= 142.15 g mol<sup>-1</sup>) and  $M_{EBiB}$  (= 195.05 g mol<sup>-1</sup>) are the molecular weight of GMA and EBiB, respectively. <sup>d</sup>Obtained from SEC measurements.

**Table S2.** Reaction conditions and results for the effect of varying  $[GMA]_0/[EBiB]_0$  on the alloy-mediated ambient temperature photoRDRP of GMA in ionic liquid using EBiB as the initiator.<sup>a</sup>

| Entry | $[GMA]_0/[EBiB]_0$ | Conv. <sup>b</sup> (%) | $M_{n,theo.}^c$ (g mol <sup>-1</sup> ) | $M_{n,SEC}^d$ (g mol <sup>-1</sup> ) | $\bar{D}^d$ |
|-------|--------------------|------------------------|----------------------------------------|--------------------------------------|-------------|
| P7    | 10                 | 100                    | 1600                                   | 1900                                 | 1.19        |
| P8    | 25                 | 100                    | 3700                                   | 3300                                 | 1.17        |
| P9    | 50                 | 100                    | 7300                                   | 6900                                 | 1.15        |
| P10   | 100                | 100                    | 14400                                  | 13800                                | 1.16        |
| P11   | 150                | 100                    | 21500                                  | 22500                                | 1.18        |
| P12   | 200                | 100                    | 28600                                  | 27700                                | 1.17        |

<sup>a</sup>Reaction Conditions: reaction time = 20 min. <sup>b</sup>Determined gravimetrically based on monomer feed. <sup>c</sup>Calculated using yield as conversion and the following equation:  $M_{n,theo} = ([GMA]_0/[EBiB]_0 \times yield \times M_{GMA}) + M_{EBiB}$ , where  $M_{GMA}$  (= 142.15 g mol<sup>-1</sup>) and  $M_{EBiB}$  (= 195.05 g mol<sup>-1</sup>) are the molecular weight of GMA and EBiB, respectively. <sup>d</sup>Obtained from SEC measurements.



**Table S3.** Reaction conditions and results for the catalyst recyclability study of alloy-mediated ambient temperature photoRDRP of GMA in ionic liquid using EBiB as the initiator.<sup>a</sup>

| Entry | Cycle  | Conv. <sup>a</sup><br>(%) | $M_{n,theo}$ <sup>c</sup><br>(g mol <sup>-1</sup> ) | $M_{n,SEC}$ <sup>d</sup><br>(g mol <sup>-1</sup> ) | $D$ <sup>d</sup> |
|-------|--------|---------------------------|-----------------------------------------------------|----------------------------------------------------|------------------|
| P13   | First  | 100                       | 28600                                               | 28100                                              | 1.18             |
| P14   | Second | 100                       | 28600                                               | 27900                                              | 1.17             |
| P15   | Third  | 100                       | 28600                                               | 28400                                              | 1.20             |
| P16   | Fourth | 100                       | 28600                                               | 28000                                              | 1.18             |

<sup>a</sup>Reaction Conditions:  $[GMA]_0/[EBiB]_0 = 200$ . <sup>b</sup>Determined gravimetrically based on monomer feed. <sup>c</sup>Calculated using yield as conversion and the following equation:  $M_{n,theo} = ([GMA]_0/[EBiB]_0 \times yield \times M_{GMA}) + M_{EBiB}$ , where  $M_{GMA}$  (= 142.15 g mol<sup>-1</sup>) and  $M_{EBiB}$  (= 195.05 g mol<sup>-1</sup>) are the molecular weight of GMA and EBiB, respectively. <sup>d</sup>Obtained from SEC measurements.

**Table S4.** Reaction conditions and results for the IL recyclability study of alloy-mediated ambient temperature photoRDRP of GMA in ionic liquid using EBiB as the initiator.<sup>a</sup>

| Entry | Extraction<br>(min) | Conv. <sup>a</sup><br>(%) | $M_{n,theo}$ <sup>c</sup><br>(g mol <sup>-1</sup> ) | $M_{n,SEC}$ <sup>d</sup><br>(g mol <sup>-1</sup> ) | $D$ <sup>d</sup> |
|-------|---------------------|---------------------------|-----------------------------------------------------|----------------------------------------------------|------------------|
| P17   | 1 <sup>st</sup>     | 100                       | 28600                                               | 28100                                              | 1.18             |
| P18   | 2 <sup>nd</sup>     | 100                       | 28600                                               | 27700                                              | 1.17             |
| P19   | 3 <sup>rd</sup>     | 100                       | 28600                                               | 28800                                              | 1.16             |

<sup>a</sup>Reaction Conditions:  $[GMA]_0/[EBiB]_0 = 200$ . <sup>b</sup>Determined gravimetrically based on monomer feed. <sup>c</sup>Calculated using yield as conversion and the following equation:  $M_{n,theo} = ([GMA]_0/[EBiB]_0 \times yield \times M_{GMA}) + M_{EBiB}$ , where  $M_{GMA}$  (= 142.15 g mol<sup>-1</sup>) and  $M_{EBiB}$  (= 195.05 g mol<sup>-1</sup>) are the molecular weight of GMA and EBiB, respectively. <sup>d</sup>Obtained from SEC measurements.

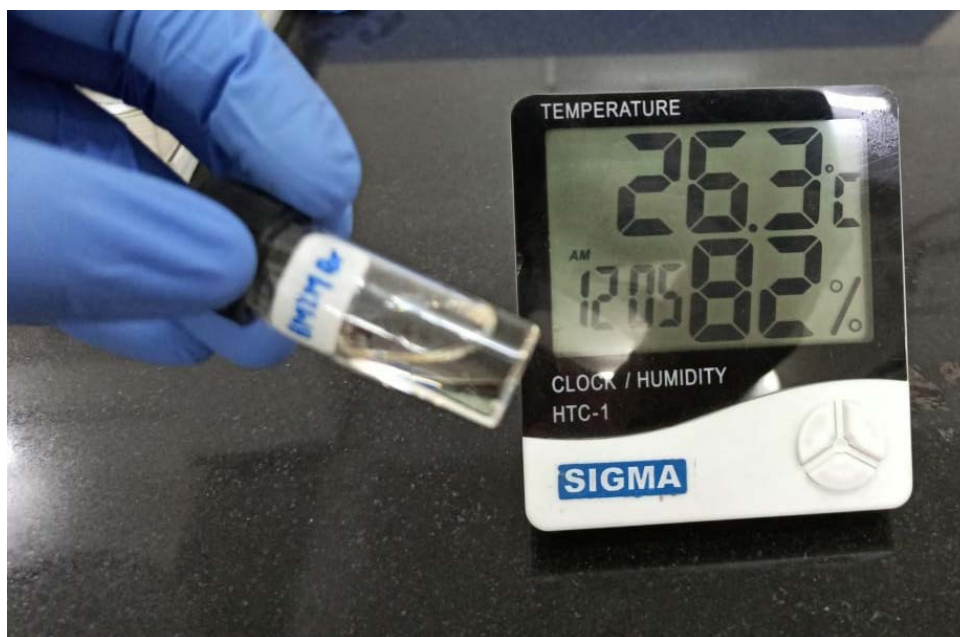

**Fig. S1** Representative image of the ionic liquid, BMIMBr at ambient temperature.

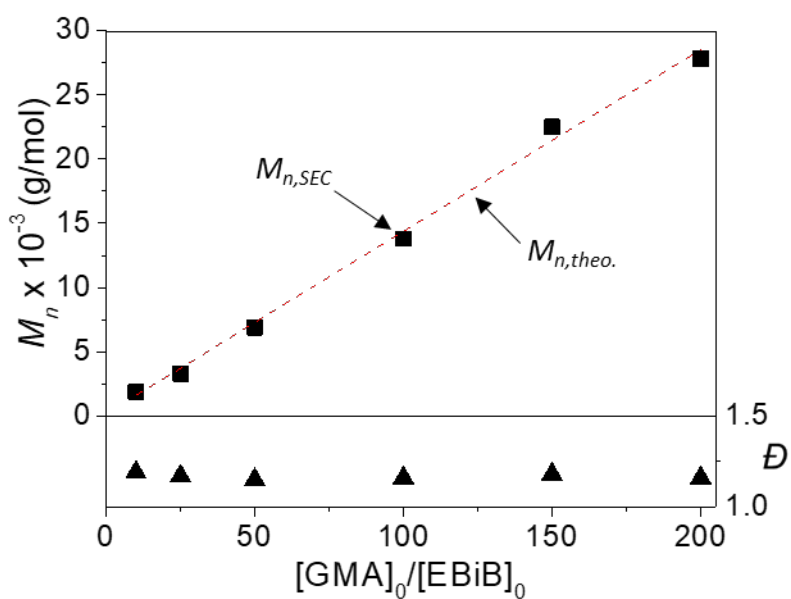

**Fig. S2** Evolution of  $M_n$  and  $D$  with increasing  $[GMA]_0/[EBiB]_0$  for recyclable alloy-mediated ambient temperature photoRDRP in ionic liquid using EBiB as the initiator (P7–P12, Table S2).

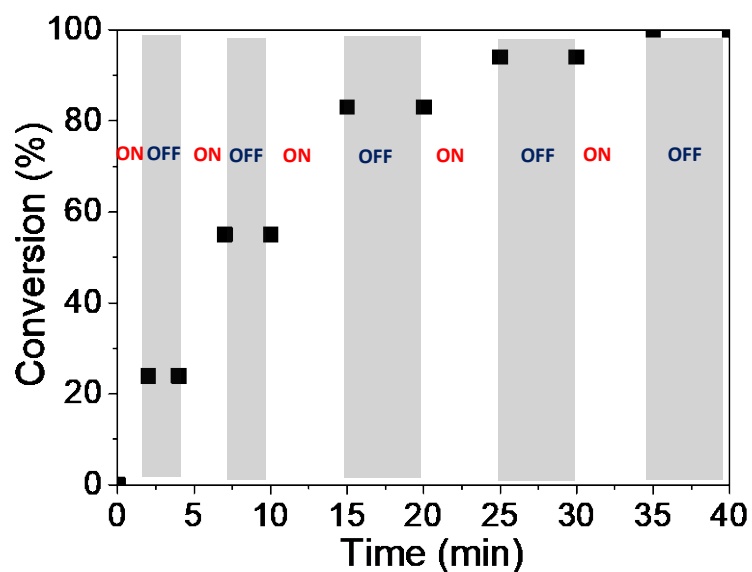

**Fig. S3** Evidence of temporal control via consecutive light (white area) and dark (shaded area) exposure for recyclable alloy-mediated ambient temperature photoRDRP in ionic liquid using EBiB as the initiator.

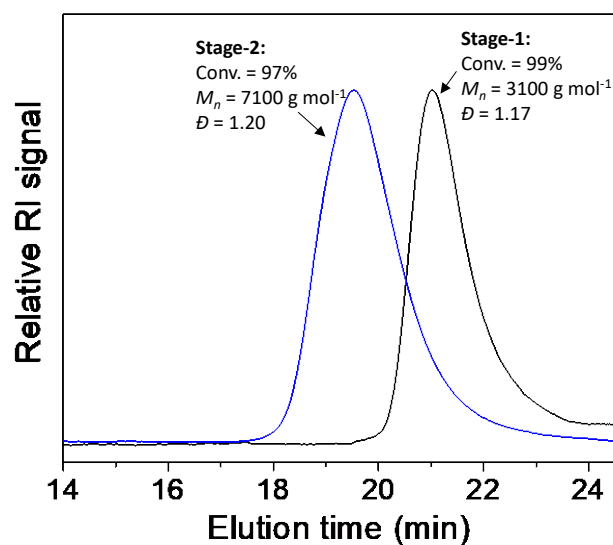

**Fig. S4** Evolution of SEC traces along with  $M_n$  and  $D$  values during *in situ* chain extension for alloy-mediated ambient temperature photoRDRP of GMA in ionic liquid using EBiB as the initiator.

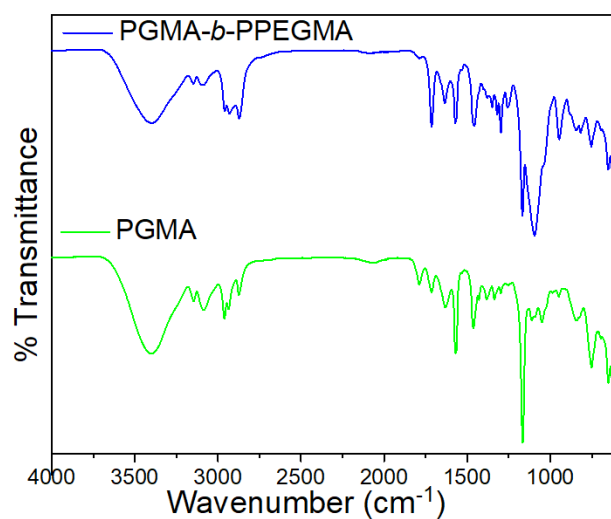

**Fig. S5** ATR-IR spectra of PGMA-Br macroinitiator (a) and PGMA-*b*-PPEGMA.

Strong peaks at  $1285\text{ cm}^{-1}$  and  $842\text{ cm}^{-1}$  suggested the presence of the epoxy groups of GMA. The C=O stretching peak at  $1718\text{ cm}^{-1}$  emerged due to the introduction of ester-containing PEGMA, while C-O-C at  $1094\text{ cm}^{-1}$  peaks increased, revealing the success of the block copolymer formation with PGMA.<sup>1</sup>

#### **D. References.**

1. Z. Cheng, X. Zhu, E. Kang and K. Neoh, *Langmuir*, 2005, **21**, 7180-7185.
